# Supplementary material
Source: PubMed Central journal article supplement (PMC2290764)
Supplement: pnas_0709378105_1.pdf [file pnas_0709378105_1.pdf]

## Appendix A. Details on the limb diversity data set on fossil and living Crustacea

Datasets on limb diversity from Cisne (1) and Wills *et al.* (2) were used as starting points, with all limb formulae verified or rescored for this study by M.A.W. To provide even coverage of the entire range of body plan diversity in both fossil and Recent Crustacea, many additional taxa were coded. We adopted largely an ordinal-level approach because previous workers found little variation in tagmosis values within orders (1, 3). Although one must be cautious of circularity when using a taxonomic approach to sampling morphologies, we suggest that this is not a major issue here. Although limbs can be among the defining features of orders, many other characters are generally also used to designate orders (e.g., carapace and somite features) (see 4). Moreover, the degree of limb differentiation along the body axis cannot be inferred from particular limb traits.

We initially coded one representative from each order, following the taxonomic scheme of Martin and Davis (5) for living representatives. However, additional exemplars were coded in a number of orders. In most cases, the limb formulae were identical or very similar (resulting in a difference of  $<0.1$  Brillouin tagmosis units), and just one representative was selected. However, there was more variation observed in the Brachypoda, Anaspidacea, and Diplostraca. In the first two cases, the indices from two exemplars were averaged to provide the values used for these orders in all analyses. The case of Diplostraca was more complex.

Although it was preferable to use ordinal definitions according to one set of authors for consistency, the diplostracans are anomalous in their level of tagmosis diversity ( $>1.0$  Brillouin tagmosis units). Moreover, the ranks of the taxa in this group have been the subject of much discussion, with several key branchiopod works adopting a system that includes seven different orders of “diplostracans” (6-8). Therefore, we sampled a representative of each of these seven orders and used a phylogenetically weighted average to calculate a single value for the Diplostraca. The topology [Laevicaudata, Spinicaudata, Cyclotherida (Haplopoda, Onychopoda), (Anomopoda,

Ctenopoda] was selected because of its support in maximum likelihood (ML), Bayesian, and maximum parsimony analyses based on six genes (9) and in ML and Bayesian analyses involving two ribosomal genes (10). Although the Notostraca fell within the Diplostraca in some of these phylogenies, we retained the exemplar of this order as separate (as in ref. 5).

Many problematic fossil taxa are not formally assigned to orders, or they are treated very differently by several authors. These, by their very nature, often preserve unique combinations of characters, unfamiliar patterns of serial limb differentiation, and distinctive and/or apomorphic appendage morphologies. Their inclusion was vital to encompass the full disparity of tagmosis patterns. Schram (4) provided the most recent classification including all fossil Crustacea, to which we added several problematic, anomalous, or more recently described fossils (11-14). The affinities of the Euthycarcinoidea (13) are, at best, uncertain, with a number of authors allying them to the hexapods or myriapods, and others resolving them as stem-group mandibulates (14). None of the trends or conclusions discussed in this paper is materially affected by their omission. In addition, the ostracod taxonomy was revised according to Liebau (15). Geological ranges were according to Benton (16), updated using taxon-specific sources and more recent evidence (11-14, 17-22). All data are presented in Table A1.

There are approximately five ordinal-level taxa of which we are aware that are missing from our current dataset. In a few cases, these absences are caused by inadequate preservation of limb structure. Anything less than the most exceptional preservation could bias toward an underestimate of the disparity of appendage types in fossils, whereas more compromised preservation might underestimate the number of limb pairs.

Because most of the primarily parasitic higher taxa have very low tagmosis values for their classes (and sometimes even no limbs at all), parasites were omitted from analyses unless otherwise indicated. However, they were included in Table A1 for a more complete record of the range of morphological diversity found in the Crustacea.

1. Cisne JL (1974) *Evolution (Lawrence, Kans)* 28:337-366.
2. Wills MA, Briggs DEG, Fortey RA (1997) *Arthropod Relationships*, eds Fortey RA, Thomas RH (Chapman & Hall, London), pp 57-65.
3. Flessa KW, Powers KV, Cisne JL (1975) *Paleobiology* 1:71-81.
4. Schram FR (1986) *Crustacea* (Oxford University Press, New York).
5. Martin JW, Davis GE (2001) *Nat Hist Mus Los Angeles County Sci Ser* 39:1-124.
6. Fryer G (1987) *Zool J Linn Soc* 91:357-383.
7. Fryer G (1987) *Hydrobiologia* 145:29-28.
8. Dumont HJ, Negrea SV (2002) *Introduction to the Class Branchiopoda: Guides to the Identification of the Microinvertebrates of the Continental Waters of the World* (Backhuys, Leiden), Vol 19.
9. deWaard JR, Sacherová V, Cristescu MEA, Remigio EA, Crease TJ, Hebert PDN (2006) *Mol Phylogenet Evol* 39:491-502.
10. Stenderup JT, Olesen J, Glenner H (2006) *Mol Phylogenet Evol* 41:182-194.

11. Waloszek D, Müller KJ (1990) *Lethaia* 23:409-427.
12. Briggs DEG, Bartels C (2001) *Palaeontology* 44:275-303.
13. Wilson HM, Almond JE (2001) *Palaeontology* 44:143-156.
14. Vaccari NE, Edgecombe GD, Escudero C (2004) *Nature* 430:554-557.
15. Liebau A (2005) *Hydrobiologia* 538:115-137.
16. Benton MJ (1993) *The Fossil Record 2* (Chapman & Hall, London), 2nd Ed, pp 321–356.
17. Schram FR (1974) *Fieldiana Geol.* 33:95-124.
18. Wills MA (1998) *Biol J Linn Soc* 65:455-500.
19. Yan-bin S, Taylor RS, Schram FR (1998) *Contrib Zool* 68:19-36.
20. Schram FR, Cees Hof CHJ, Mapes RH, Snowdon P (2003) *Contrib Zool* 72:1-16.
21. Waloszek D, Repetski JE, Maas A (2005) *Trans R Soc Edinburgh Earth Sci* 96:163-176.

22. Kotov AA, Korovchinsky NM (2006) *Zool J Linn Soc* 146:269-274.

**Table A1. Limb formulae and limb diversity indices for all crustacean taxa included in the work.**

The limb formulae specify the number of limbs of each limb type (from anterior to posterior), while numbers in parentheses indicate the disparity (i.e., differentiation) score of each of limb pair from the adjacent, posterior limb pair. Primarily parasitic or commensal groups are designated after the order name (PAR) and were excluded from most analyses.

| Order                     | Stratigraphic range | Scored taxon                               | Limb formula                                                | Tagmosis (Brillouin index) | Total no. of limbs | No. of limb types | No. of types per limb | Average disparity per limb | Total disparity score of limb differences |
|---------------------------|---------------------|--------------------------------------------|-------------------------------------------------------------|----------------------------|--------------------|-------------------|-----------------------|----------------------------|-------------------------------------------|
| <b>Class Branchiopoda</b> |                     |                                            |                                                             |                            |                    |                   |                       |                            |                                           |
| Lipostraca <sup>†</sup>   | PRA-PRA             | <i>Lepidocaris rhyniensis</i> <sup>†</sup> | 1(3),1(4),1(4),1(4),<br>1(2),2(1),3(1),5(3),<br>1(2),1(2),1 | 2.334                      | 18                 | 11                | 0.6111                | 1.444                      | 26                                        |
| Kazacharthra <sup>†</sup> | CRN-TOA             | <i>Almatium gusevi</i> <sup>†</sup>        | 1(3),1(4),1(3),1(3),<br>1(4),1(1),5(1),5(4),<br>1           | 2.031                      | 17                 | 9                 | 0.5294                | 1.353                      | 23                                        |
| Anostraca                 | LUD-HOL             | <i>Artemia salina</i>                      | 1(4),1(4),1(3),1(3),<br>1(4),1(3),1(3),1                    | 1.514                      | 18                 | 8                 | 0.4444                | 1.333                      | 24                                        |

| Order                       | Stratigraphic range | Scored taxon                 | Limb formula                                                 | Tagmosis (Brillouin index) | Total no. of limbs | No. of limb types | No. of types per limb | Average disparity per limb | Total disparity score of limb differences |
|-----------------------------|---------------------|------------------------------|--------------------------------------------------------------|----------------------------|--------------------|-------------------|-----------------------|----------------------------|-------------------------------------------|
| Notostraca                  | KAS-HOL             | <i>Lepidurus lynchi</i>      | 1(2),1(4),1(3),1(3),<br>1(5),1(2),1(2),9(2),<br>60(4),1(1),1 | 1.174                      | 78                 | 11                | 0.1410                | 0.359                      | 28                                        |
| Diplostraca (Laevicaudata)  | BER-HOL             | <i>Lyncaeus brachyurus</i>   | 1(4),1(4),1(4),1(2),<br>1(4),13(4),1                         | 1.275                      | 19                 | 7                 | 0.3684                | 1.158                      | 22                                        |
| Diplostraca (Spinicaudata)  | LOK-HOL             | <i>Limnadia lenticularis</i> | 1(4),1(4),1(4),1(2),<br>1(4),22(4),1                         | 1.001                      | 28                 | 7                 | 0.250                 | 0.786                      | 22                                        |
| Diplostraca (Cyclestherida) | HOL-HOL             | <i>Cyclestheria hislopi</i>  | 1(4),1(4),1(4),1(2),<br>1(4),15(4),1                         | 1.201                      | 21                 | 7                 | 0.333                 | 1.048                      | 22                                        |
| Diplostraca (Anomopoda)     | BER-HOL             | <i>Daphnia pulex</i>         | 1(5),1(4),1(4),1(3),<br>1(3),1(1),2(2),1(3),<br>1            | 2.079                      | 10                 | 9                 | 0.900                 | 2.5                        | 25                                        |
| Diplostraca (Ctenopoda)     | TTH-HOL             | <i>Sida crystallina</i>      | 1(5),1(4),1(4),1(3),<br>1(4),5(1),1(3),1                     | 1.827                      | 12                 | 8                 | 0.667                 | 2.0                        | 24                                        |
| Diplostraca (Haplopoda)     | HOL-HOL             | <i>Leptodora kindtii</i>     | 1(5),1(4),1(4),1(5),<br>1(2),3(2),1(2),1(3),<br>1            | 2.061                      | 11                 | 9                 | 0.818                 | 2.455                      | 27                                        |

| Order                                               | Stratigraphic range | Scored taxon                                              | Limb formula                                   | Tagmosis (Brillouin index) | Total no. of limbs | No. of limb types | No. of types per limb | Average disparity per limb | Total disparity score of limb differences |
|-----------------------------------------------------|---------------------|-----------------------------------------------------------|------------------------------------------------|----------------------------|--------------------|-------------------|-----------------------|----------------------------|-------------------------------------------|
| Diplostraca (Onychopoda)                            | HOL-HOL             | <i>Cercopagis pengoi</i>                                  | 1(5),1(4),1(4),1(5),<br>1(1),3(3),1(3),1       | 1.921                      | 10                 | 8                 | 0.800                 | 2.5                        | 25                                        |
| Diplostraca (composite used for taxonomic analyses) | LOK-HOL             | Phylogenetically weighted average of the seven taxa above |                                                | 1.284                      | 20.47              | 7.188             | 0.388                 | 1.202                      | 22.41                                     |
| <b>Class Remipedia</b>                              |                     |                                                           |                                                |                            |                    |                   |                       |                            |                                           |
| Nectiopoda                                          | HOL-HOL             | <i>Speleonectes ondiniae</i>                              | 1(3),1(3),1(4),1(4),<br>1(2),1(1),1(4),19(3),1 | 1.347                      | 27                 | 9                 | 0.333                 | 0.889                      | 24                                        |
| Enantiopoda <sup>†</sup>                            | VIS-MOS             | <i>Tesnusocaris goldichi</i> <sup>†</sup>                 | 1(5),1(5),1(3),1(1),<br>1(5),15(1),1           | 1.201                      | 21                 | 7                 | 0.333                 | 0.952                      | 20                                        |
| <b>Class Cephalocarida</b>                          |                     |                                                           |                                                |                            |                    |                   |                       |                            |                                           |
| Brachypoda                                          | HOL-HOL             | <i>Hutchinsoniella macracantha</i>                        | 1(3),1(4),1(4),1(2),<br>8(3),1(2),1(3),1       | 1.663                      | 15                 | 8                 | 0.533                 | 1.4                        | 21                                        |
| Brachypoda                                          | HOL-HOL             | <i>Sandersiella acuminata</i>                             | 1(3),1(4),1(4),1(2),<br>6(1),1(1),1(3),1(2),   | 2.051                      | 15                 | 10                | 0.667                 | 1.533                      | 23                                        |

| Order                                           | Stratigraphic range | Scored taxon                  | Limb formula                                           | Tagmosis (Brillouin index) | Total no. of limbs | No. of limb types | No. of types per limb | Average disparity per limb | Total disparity score of limb differences |
|-------------------------------------------------|---------------------|-------------------------------|--------------------------------------------------------|----------------------------|--------------------|-------------------|-----------------------|----------------------------|-------------------------------------------|
|                                                 |                     |                               | 1(3),1                                                 |                            |                    |                   |                       |                            |                                           |
| Brachypoda<br>(composite used for all analyses) | HOL-HOL             | Average of the two taxa above |                                                        | 1.857                      | 15                 | 9                 | 0.6                   | 1.467                      | 22                                        |
| <b>Class Maxillopoda</b>                        |                     |                               |                                                        |                            |                    |                   |                       |                            |                                           |
| Infraclass Facetotecta (PAR)                    | HOL-HOL             |                               | N/A (no limbs in adults)                               |                            |                    |                   |                       |                            |                                           |
| Laurida (Infraclass Ascothoracida) (PAR)        | CMP-HOL             | <i>Synagoga normani</i>       | 1(4),1(4),1(3),1(4),<br>1(3),1(2),2(1),2(4),<br>1      | 2.114                      | 11                 | 9                 | 0.818                 | 2.273                      | 25                                        |
| Dendrogastrida (Infraclass Ascothoracida) (PAR) | TUR-HOL             | <i>Ascothorax ophioctenis</i> | 1(4),1(4),1(3),1(3),<br>1(3),1(2),2(2),1(2),<br>1(4),1 | 2.205                      | 11                 | 10                | 0.909                 | 2.455                      | 27                                        |
| Apygophora (Superorder Acrothoracica)           | ANS-HOL             | <i>Trypetesa lateralis</i>    | 1(3),1(1),1(5),1(5),<br>3(4),1                         | 1.589                      | 8                  | 6                 | 0.75                  | 2.25                       | 18                                        |
| Pygophora                                       | LOK-HOL             | <i>Weltneria hessleri</i>     | 1(3),1(1),1(5),1(5),                                   | 1.488                      | 10                 | 6                 | 0.6                   | 1.8                        | 18                                        |



| Order                                         | Stratigraphic range | Scored taxon                    | Limb formula                        | Tagmosis (Brillouin index) | Total no. of limbs | No. of limb types | No. of types per limb | Average disparity per limb | Total disparity score of limb differences |
|-----------------------------------------------|---------------------|---------------------------------|-------------------------------------|----------------------------|--------------------|-------------------|-----------------------|----------------------------|-------------------------------------------|
| (Superorder Acrothoracica)                    |                     | (female)                        | 5(4),1                              |                            |                    |                   |                       |                            |                                           |
| Kentrogonida (Superorder Rhizocephala) (PAR)  | HOL-HOL             | <i>Sacculina carcini</i>        | N/A (no limbs in adults)            |                            |                    |                   |                       |                            |                                           |
| Akentrogonida (Superorder Rhizocephala) (PAR) | HOL-HOL             | <i>Chthamalophilus delagei</i>  | N/A (no limbs in adults)            |                            |                    |                   |                       |                            |                                           |
| Pedunculata (Superorder Thoracica)            | STD-HOL             | <i>Lepas anatifera</i>          | 1(5),1(3),1(1),1(5),<br>3(3),3      | 1.662                      | 10                 | 6                 | 0.6                   | 1.7                        | 17                                        |
| Sessilia (Superorder Thoracica)               | TTH-HOL             | <i>Balanus balanoides</i>       | 1(5),1(3),1(1),1(5),<br>3(3),3      | 1.662                      | 10                 | 6                 | 0.6                   | 1.7                        | 17                                        |
| Subclass Tantulocarida (PAR)                  | HOL-HOL             | <i>Basipodella harpacticola</i> | 1(5),1                              | 0.5                        | 2                  | 2                 | 1                     | 2.5                        | 5                                         |
| Arguloidea (Subclass Branchiura) (PAR)        | HOL-HOL             | <i>Argulus foliaceus</i>        | 1(4),1(4),1(5),1(5),<br>1(4),4(3),1 | 1.721                      | 10                 | 7                 | 0.7                   | 2.5                        | 25                                        |

| Order                                        | Stratigraphic range | Scored taxon                   | Limb formula                                           | Tagmosis (Brillouin index) | Total no. of limbs | No. of limb types | No. of types per limb | Average disparity per limb | Total disparity score of limb differences |
|----------------------------------------------|---------------------|--------------------------------|--------------------------------------------------------|----------------------------|--------------------|-------------------|-----------------------|----------------------------|-------------------------------------------|
| Cephalobaenida (Subclass Pentastomida) (PAR) | MER-HOL*            | <i>Cephalobaena tetrapoda</i>  | 1(1),1                                                 | 0.5                        | 2                  | 2                 | 1                     | 0.5                        | 1                                         |
| Porocephalida (Subclass Pentastomida) (PAR)  | HOL-HOL             | <i>Sebekia</i> sp.             | 1(1),1                                                 | 0.5                        | 2                  | 2                 | 1                     | 0.5                        | 1                                         |
| Mystacocaridida                              | HOL-HOL             | <i>Derocheilocaris typicus</i> | 1(3),1(2),1(3),1(1),<br>1(2),1(2),4(3),1               | 1.879                      | 11                 | 8                 | 0.727                 | 1.455                      | 16                                        |
| Platycopioidea (Subclass Copepoda)           | HOL-HOL             | <i>Platycopia inornata</i>     | 1(3),1(4),1(3),1(3),<br>1(3),1(3),4(1),1(4),<br>1(4),1 | 2.150                      | 13                 | 10                | 0.769                 | 2.154                      | 28                                        |
| Calanoida (Copepoda)                         | HOL-HOL             | <i>Calanus finmarchicus</i>    | 1(3),1(4),1(3),1(3),<br>1(3),1(3),4(1),1(4),<br>1(4),1 | 2.150                      | 13                 | 10                | 0.769                 | 2.154                      | 28                                        |
| Misophrioida (Copepoda)                      | HOL-HOL             | <i>Misophria pallida</i>       | 1(3),1(4),1(3),1(3),<br>1(3),1(3),4(2),1(4),<br>1(4),1 | 2.150                      | 13                 | 10                | 0.769                 | 2.231                      | 29                                        |

| Order                              | Stratigraphic range | Scored taxon                     | Limb formula                                           | Tagmosis (Brillouin index) | Total no. of limbs | No. of limb types | No. of types per limb | Average disparity per limb | Total disparity score of limb differences |
|------------------------------------|---------------------|----------------------------------|--------------------------------------------------------|----------------------------|--------------------|-------------------|-----------------------|----------------------------|-------------------------------------------|
| Cyclopoida (Copepoda)              | HOL-HOL             | <i>Cyclopinoidea longicornis</i> | 1(4),1(4),1(3),1(3),<br>1(3),1(3),4(3),1(4),<br>1(4),1 | 2.150                      | 13                 | 10                | 0.769                 | 2.385                      | 31                                        |
| Gelyelloida (Copepoda)             | HOL-HOL             | <i>Gelyella droguei</i>          | 1(3),1(4),1(3),1(3),<br>1(3),1(3),3(4),1(4),<br>1      | 2.061                      | 11                 | 9                 | 0.818                 | 2.455                      | 27                                        |
| Mormonilloida (Copepoda)           | HOL-HOL             | <i>Mormonilla phasma</i>         | 1(3),1(4),1(3),1(3),<br>1(3),1(3),4(4),1(4),<br>1      | 2.021                      | 12                 | 9                 | 0.75                  | 2.25                       | 27                                        |
| Harpacticoida (Copepoda)           | MMI-HOL             | <i>Canuella perplexa</i>         | 1(3),1(4),1(3),1(3),<br>1(3),1(3),4(2),1(4),<br>1(4),1 | 2.150                      | 13                 | 10                | 0.769                 | 2.231                      | 19                                        |
| Poecilostomatoida (Copepoda) (PAR) | HOL-HOL             | <i>Clausidium vancouverense</i>  | 1(3),1(4),1(3),1(3),<br>1(3),1(3),4(3),1(4),<br>1(4),1 | 2.150                      | 13                 | 10                | 0.769                 | 2.308                      | 30                                        |
| Siphonostomatoida (Copepoda) (PAR) | APT-HOL             | <i>Asterocheres reginae</i>      | 1(3),1(4),1(3),1(3),<br>1(3),1(3),4(1),1(4),           | 2.150                      | 13                 | 10                | 0.769                 | 2.154                      | 28                                        |

| Order                                                             | Stratigraphic range | Scored taxon                   | Limb formula                                                     | Tagmosis (Brillouin index) | Total no. of limbs | No. of limb types | No. of types per limb | Average disparity per limb | Total disparity score of limb differences |
|-------------------------------------------------------------------|---------------------|--------------------------------|------------------------------------------------------------------|----------------------------|--------------------|-------------------|-----------------------|----------------------------|-------------------------------------------|
| Monstrilloida (Copepoda) (PAR, juveniles, adults are free-living) | MMI-HOL             | <i>Monstrilla helgolandica</i> | 1(4),1<br>1(3),1(4),1(3),1(3),<br>1(3),1(3),4(2),1(4),<br>1(4),1 | 2.150                      | 13                 | 10                | 0.769                 | 2.231                      | 29                                        |
| <b>Class Ostracoda</b>                                            |                     |                                |                                                                  |                            |                    |                   |                       |                            |                                           |
| Palaeocopida                                                      | TRE-TAT             | None with appendages preserved |                                                                  |                            |                    |                   |                       |                            |                                           |
| Punciocopida                                                      | TRE-HOL             | <i>Manawa staceyi</i>          | 1(2),1(3),1(4),1(3),<br>3(2),1                                   | 1.589                      | 8                  | 6                 | 0.75                  | 1.75                       | 14                                        |
| Platycopida                                                       | TRE-HOL             | <i>Cytherella abyssorum</i>    | 1(3), 1(4), 1(3), 1(3),<br>1(3), 1(4), 1                         | 1.757                      | 7                  | 7                 | 1                     | 2.857                      | 20                                        |
| Podocopida                                                        | ARG-HOL             | <i>Macrocypriis maddocksaе</i> | 1(2), 1(4), 1(3), 1(4),<br>1(4), 1                               | 1.582                      | 6                  | 6                 | 1                     | 2.833                      | 17                                        |
| Cypridinida                                                       | LLY-HOL             | <i>Cypridina norvegica</i>     | 1(4), 1(4), 1(3), 1(4),<br>1(4), 1(5), 1(5), 1                   | 1.912                      | 8                  | 8                 | 1                     | 3.625                      | 29                                        |

| Order                                                                                     | Stratigraphic range | Scored taxon                                     | Limb formula                                                   | Tagmosis (Brillouin index) | Total no. of limbs | No. of limb types | No. of types per limb | Average disparity per limb | Total disparity score of limb differences |
|-------------------------------------------------------------------------------------------|---------------------|--------------------------------------------------|----------------------------------------------------------------|----------------------------|--------------------|-------------------|-----------------------|----------------------------|-------------------------------------------|
| Halocypridida                                                                             | WEN-HOL             | <i>Halocypris pelagica</i>                       | 1(2), 1(4), 1(3), 1(2), 1(2), 1(2), 1(4), 1                    | 1.912                      | 8                  | 8                 | 1                     | 2.375                      | 19                                        |
| Leperditicopida <sup>†</sup>                                                              | ARG-FAM             | None with appendages preserved                   |                                                                |                            |                    |                   |                       |                            |                                           |
| Bradoriida (Ostracoda) <sup>†</sup> (excluded from analysis because of poor preservation) | CRF-TRE             | <i>Kunmingella maotianshanensis</i> <sup>†</sup> | Tentatively: 1(4), 3(3), 1(2), 2                               | 1.245                      | 7                  | 4                 | 0.571                 | 1.286                      | 9                                         |
| <b>Class Malacostraca</b>                                                                 |                     |                                                  |                                                                |                            |                    |                   |                       |                            |                                           |
| Archaeostraca <sup>†</sup>                                                                | TRE-TAT             | <i>Nahecaris</i> <sup>†</sup>                    | 1(3), 1(4), 1(2), 1(1), 1(3), 8(3), 5(3), 1                    | 1.818                      | 19                 | 8                 | 0.421                 | 1                          | 19                                        |
| Hoplostroaca <sup>†</sup> (excluded from analysis because of poor preservation)           | VIS-MOS             | <i>Kellibrooksia macrogaster</i> <sup>†</sup>    | Tentatively: 1(2), 1(3), 1(2), 1(2), 1(5), 1(4), 7(3), 5(3), 1 | 1.976                      | 19                 | 9                 | 0.474                 | 1.263                      | 24                                        |

| Order                          | Stratigraphic range | Scored taxon                                 | Limb formula                                                | Tagmosis (Brillouin index) | Total no. of limbs | No. of limb types | No. of types per limb | Average disparity per limb | Total disparity score of limb differences |
|--------------------------------|---------------------|----------------------------------------------|-------------------------------------------------------------|----------------------------|--------------------|-------------------|-----------------------|----------------------------|-------------------------------------------|
| Leptostraca                    | KAZ-HOL             | <i>Nebalia pugettensis</i>                   | 1(3),1(3),1(3),1(3),<br>1(3),8(4),4(4),2(1),<br>1           | 2.010                      | 20                 | 9                 | 0.45                  | 1.2                        | 24                                        |
| Aeschronectida <sup>†</sup>    | VIS-GZE             | <i>Kallidecthes richardsoni</i> <sup>†</sup> | 1(3),1(4),1(2),1(2),<br>1(2),8(2),5(3),1                    | 1.818                      | 19                 | 8                 | 0.421                 | 0.947                      | 18                                        |
| Palaeostomatopoda <sup>†</sup> | FAM-SPK             | <i>Tyrranophontes theridion</i> <sup>†</sup> | 1(2),1(3),1(3),1(1),<br>1(3),1(5),4(4),3(4),<br>5(3),1      | 2.246                      | 19                 | 10                | 0.526                 | 1.474                      | 28                                        |
| Stomatopoda                    | SPK-HOL             | <i>Squilla mantis</i>                        | 1(4),1(4),1(3),1(4),<br>1(4),1(5),1(4),3(4),<br>3(4),5(4),1 | 2.352                      | 19                 | 11                | 0.579                 | 2.105                      | 40                                        |
| Eocaridacea <sup>†</sup>       | GIV-MOS             | <i>Eocaris socialis</i> <sup>†</sup>         | 1(3),1(5),1(3),1(1),<br>1(4),8(4),5(3),1                    | 1.818                      | 19                 | 8                 | 0.421                 | 1.211                      | 23                                        |
| Belotelsonidea <sup>†</sup>    | TOU-MOS             | <i>Belotelson magister</i> <sup>†</sup>      | 1(3),1(5),1(3),1(1),<br>1(4),8(4),5(3),1(3),<br>1           | 1.944                      | 20                 | 9                 | 0.45                  | 1.3                        | 26                                        |
| Palaeocaridacea <sup>†</sup>   | VIS-KUN             | <i>Acanthotelson</i>                         | 1(3),1(4),1(3),1(1),                                        | 2.207                      | 19                 | 10                | 0.526                 | 1.211                      | 23                                        |

| Order                                            | Stratigraphic range | Scored taxon                   | Limb formula                                                     | Tagmosis (Brillouin index) | Total no. of limbs | No. of limb types | No. of types per limb | Average disparity per limb | Total disparity score of limb differences |
|--------------------------------------------------|---------------------|--------------------------------|------------------------------------------------------------------|----------------------------|--------------------|-------------------|-----------------------|----------------------------|-------------------------------------------|
|                                                  |                     | <i>stimpsoni</i> <sup>†</sup>  | 1(2),1(2),2(3),5(3),<br>5 (2),1                                  |                            |                    |                   |                       |                            |                                           |
| Bathynellacea                                    | HOL-HOL             | <i>Bathynella natans</i>       | 1(2),1(3),1(3),1(2),<br>1(3),2(2),5(3),1(2),<br>1(3),1(3),1      | 2.271                      | 16                 | 11                | 0.688                 | 1.625                      | 26                                        |
| Anaspidacea                                      | ANS-HOL             | <i>Anaspides tasmaniae</i>     | 1(3),1(4),1(3),1(3),<br>1(4),1(2),1(1),5(3),<br>1(1),5(4),1      | 2.260                      | 19                 | 11                | 0.579                 | 1.474                      | 28                                        |
| Anaspidacea                                      | ANS-HOL             | <i>Parastygocaris andina</i>   | 1(3),1(4),1(3),1(3),<br>1(4),1(2),1(1),5(3),<br>1(3),1           | 2.103                      | 14                 | 10                | 0.714                 | 1.857                      | 26                                        |
| Anaspidacea<br>(composite used for all analyses) | ANS-HOL             | Average of the two taxa above  |                                                                  | 2.182                      | 16.5               | 10.5              | 0.646                 | 1.666                      | 27                                        |
| Spelaeogriphacea                                 | TOU-HOL             | <i>Spelaeogriphus lepidops</i> | 1(3),1(4),1(2),1(2),<br>1(3),1(3),3(2),3(2),<br>1(3),4(3),1(3),1 | 2.474                      | 19                 | 12                | 0.632                 | 1.579                      | 30                                        |

| Order                                                                                                                        | Stratigraphic range | Scored taxon                                | Limb formula                                                | Tagmosis (Brillouin index) | Total no. of limbs | No. of limb types | No. of types per limb | Average disparity per limb | Total disparity score of limb differences |
|------------------------------------------------------------------------------------------------------------------------------|---------------------|---------------------------------------------|-------------------------------------------------------------|----------------------------|--------------------|-------------------|-----------------------|----------------------------|-------------------------------------------|
| Spelaeogriphacea (included in matched-pairs analysis; this taxon formerly in separate order Anthracocaridacea <sup>†</sup> ) | TOU-SPK             | <i>Acadiocaris novascotica</i> <sup>†</sup> | 1(3),1(3),1(3),1(3),<br>1(4),2(3),6(3),5(4),<br>1           | 2.0714                     | 19                 | 9                 | 0.474                 | 1.368                      | 26                                        |
| Thermosbaenacea                                                                                                              | HOL-HOL             | <i>Thermosbaena mirabilis</i>               | 1(3),1(3),1(3),1(3),<br>1(2),1(3),1(3),4(3),<br>2(4),1      | 2.197                      | 14                 | 10                | 0.714                 | 1.929                      | 27                                        |
| Lophogastrida                                                                                                                | MOS-HOL             | <i>Eucopia sculpticaudata</i>               | 1(3),1(4),1(3),1(3),<br>1(4),1(4),4(4),3(3),<br>1(4),5(4),1 | 2.350                      | 20                 | 11                | 0.55                  | 1.8                        | 36                                        |
| Mysida                                                                                                                       | CLV-HOL             | <i>Mysis relicta</i>                        | 1(3),1(4),1(3),1(3),<br>1(4),1(3),1(1),6(4),<br>5(4),1      | 2.124                      | 19                 | 10                | 0.526                 | 1.526                      | 29                                        |
| Pygocephalomorpha <sup>†</sup>                                                                                               | TOU-TAT             | <i>Anthracaris gracilis</i> <sup>†</sup>    | 1(3),1(4),1(2),1(2),<br>1(3),2(4),6(3),5(3),                | 2.184                      | 20                 | 10                | 0.5                   | 1.4                        | 28                                        |



| Order        | Stratigraphic range | Scored taxon                      | Limb formula                                                     | Tagmosis (Brillouin index) | Total no. of limbs | No. of limb types | No. of types per limb | Average disparity per limb | Total disparity score of limb differences |
|--------------|---------------------|-----------------------------------|------------------------------------------------------------------|----------------------------|--------------------|-------------------|-----------------------|----------------------------|-------------------------------------------|
|              |                     |                                   | 1(4),1                                                           |                            |                    |                   |                       |                            |                                           |
| Mictacea     | HOL-HOL             | <i>Mictocaris halope</i> (female) | 1(3),1(3),1(3),1(2),<br>1(3),1(3),5(1),2(3),<br>5(4),1           | 2.207                      | 19                 | 10                | 0.526                 | 1.316                      | 25                                        |
| Amphipoda    | PRB-HOL             | <i>Gammarus locustus</i>          | 1(2),1(4),1(3),1(3),<br>1(4),1(3),2(2),2(1),<br>3(3),3(3),2(2),1 | 2.557                      | 19                 | 12                | 0.632                 | 1.579                      | 30                                        |
| Isopoda      | MOS-HOL             | <i>Whoia angusta</i>              | 1(2),1(4),1(3),1(3),<br>1(4),1(3),1(2),3(1),<br>3(3),1(3),4(2),1 | 2.474                      | 19                 | 12                | 0.632                 | 1.579                      | 30                                        |
| Tanaidacea   | VIS-HOL             | <i>Apseudes spinosus</i>          | 1(2),1(4),1(3),1(4),<br>1(4),1(5),1(3),3(2),<br>3(4),5(4),1      | 2.352                      | 19                 | 11                | 0.579                 | 1.842                      | 35                                        |
| Cumacea      | SPK-HOL             | <i>Cyclaspis bacescui</i>         | 1(2),1(3),1(3),1(3),<br>1(4),1(4),1(4),1(2),<br>2(1),3(3),5(2),1 | 2.435                      | 19                 | 12                | 0.632                 | 1.632                      | 31                                        |
| Euphausiacea | HOL-HOL             | <i>Meganyctiphanes</i>            | 1(3),1(4),1(4),1(2),                                             | 2.234                      | 20                 | 11                | 0.55                  | 1.7                        | 34                                        |

| Order                      | Stratigraphic range | Scored taxon                               | Limb formula                                                                   | Tagmosis (Brillouin index) | Total no. of limbs | No. of limb types | No. of types per limb | Average disparity per limb | Total disparity score of limb differences |
|----------------------------|---------------------|--------------------------------------------|--------------------------------------------------------------------------------|----------------------------|--------------------|-------------------|-----------------------|----------------------------|-------------------------------------------|
|                            |                     | <i>norvegica</i>                           | 1(3),6(4),1(4),1(5),<br>5(2),1(3),1                                            |                            |                    |                   |                       |                            |                                           |
| Amphionidacea              | HOL-HOL             | <i>Amphionides reynaudii</i>               | 1(3),1(4),1(3),1(4),<br>1(3),1(4),1(2),2(2),<br>1(2),2(3),1(4),1(3),<br>4(2),1 | 2.641                      | 19                 | 14                | 0.737                 | 2.053                      | 39                                        |
| Decapoda                   | FAM-HOL             | <i>Homarus americanus</i>                  | 1(3),1(4),1(3),1(3),<br>1(3),1(3),1(3),1(5),<br>1(3),2(1),2(4),5(4),<br>1      | 2.518                      | 19                 | 13                | 0.684                 | 2.053                      | 39                                        |
| ?                          | FAM-FAM             | <i>Angustidontus seriatus</i> <sup>†</sup> | 1(4),1(5),1(2),2(5),<br>1(5),3(1),4(4),5(4),<br>1                              | 2.194                      | 19                 | 9                 | 0.474                 | 1.579                      | 30                                        |
| <b>Taxonomy uncertain</b>  |                     |                                            |                                                                                |                            |                    |                   |                       |                            |                                           |
| Canadaspidida <sup>†</sup> | CRF-STD             | <i>Canadaspis</i> <sup>†</sup>             | 1(2),1(4),1(5),2(1),<br>8(4),1                                                 | 1.432                      | 14                 | 6                 | 0.4286                | 1.143                      | 16                                        |
| Canadaspidida <sup>†</sup> | CRF-STD             | <i>Perspica</i> <sup>*</sup>               | 1(2),1(4),1(5),10                                                              | 1.039                      | 14                 | 5                 | 0.3571                | 1.071                      | 15                                        |

| Order                       | Stratigraphic range | Scored taxon                       | Limb formula                         | Tagmosis (Brillouin index) | Total no. of limbs | No. of limb types | No. of types per limb | Average disparity per limb | Total disparity score of limb differences |
|-----------------------------|---------------------|------------------------------------|--------------------------------------|----------------------------|--------------------|-------------------|-----------------------|----------------------------|-------------------------------------------|
|                             |                     |                                    | (4),1                                |                            |                    |                   |                       |                            |                                           |
| Euthycarcinida <sup>†</sup> | CRF-CRN             | <i>Smithixerxes pustulosus</i> *   | 1(5),1(3),1(4),11                    | 0.792                      | 14                 | 4                 | 0.2857                | 0.8571                     | 12                                        |
| ?                           | STD-STD             | <i>Odaraia</i> * <sup>†</sup>      | 2(5),1(5),1(1),1(4),30(5),1          | 0.816                      | 36                 | 6                 | 0.1667                | 0.5556                     | 20                                        |
| ?                           | STD-STD             | <i>Waptia</i> * <sup>†</sup>       | 1(3),1(3),1(3),1(1),1(3),4(3),6(3),1 | 1.886                      | 16                 | 8                 | 0.5                   | 1.1875                     | 19                                        |
| ?                           | MER-MER             | <i>Skara</i> *                     | 1(3),1(1),1(2),2(1),1(2),1           | 1.614                      | 7                  | 6                 | 0.8571                | 1.286                      | 9                                         |
| ?                           | MER-MER             | <i>Martinssonina</i> *             | 1(3),3(1),1(2),1(3),1                | 1.388                      | 7                  | 5                 | 0.7143                | 1.286                      | 9                                         |
| ?                           | MER-MER             | <i>Cambropachycope clarksoni</i> * | 1(4),1(3),2(4),1(1),1                | 1.415                      | 6                  | 5                 | 0.8333                | 2                          | 12                                        |
| ?                           | MER-MER             | <i>Bredocaris</i> *                | 1(3),1(2),1(3),1(3),1(1),6(1),1(2),1 | 1.773                      | 13                 | 8                 | 0.6154                | 1.154                      | 15                                        |
| ?                           | MER-MER             | <i>Rehbachtella</i> *              | 1(3),1(2),1(2),1(2),12(2),1          | 1.147                      | 17                 | 6                 | 0.3529                | 0.6471                     | 11                                        |

| Order                                                         | Stratigraphic range | Scored taxon                                    | Limb formula                    | Tagmosis (Brillouin index) | Total no. of limbs | No. of limb types | No. of types per limb | Average disparity per limb | Total disparity score of limb differences |
|---------------------------------------------------------------|---------------------|-------------------------------------------------|---------------------------------|----------------------------|--------------------|-------------------|-----------------------|----------------------------|-------------------------------------------|
| ?                                                             | EMS-EMS             | <i>Cambronatus brasseli</i> <sup>†</sup>        | 1(5),4(5),11(5),1               | 1.088                      | 17                 | 4                 | 0.235                 | 0.882                      | 15                                        |
| ?                                                             | EMS-EMS             | <i>Wingertshellicus backesi</i> <sup>†</sup>    | 1(3),1(4),1(4),1(4),35(5),1     | 0.656                      | 40                 | 6                 | 0.15                  | 0.5                        | 20                                        |
| ?                                                             | EMS-EMS             | <i>Eschenbachielius wuttkenisi</i> <sup>†</sup> | 1(3),1(3),13(3),1               | 0.732                      | 16                 | 4                 | 0.25                  | 0.562                      | 9                                         |
| Phosphatocopida <sup>†</sup>                                  | MER-MER             | <i>Heslandonia unisulcata</i> <sup>†</sup>      | 1(4),1(2),1(4),1(3),1(1),1(2),1 | 1.757                      | 7                  | 7                 | 1                     | 2.286                      | 16                                        |
| Phosphatocopida <sup>†</sup>                                  | MER-MER             | <i>Vestrogothia</i> sp. <sup>†</sup>            | 1(3),1(2),1(2),1(2),1(1),1(3),1 | 1.757                      | 7                  | 7                 | 1                     | 1.857                      | 13                                        |
| Phosphatocopida <sup>†</sup><br>(composite used for analysis) | MER-MER             | Average of two taxa above                       |                                 | 1.757                      | 7                  | 7                 | 1                     | 2.071                      | 14.5                                      |

<sup>†</sup> Extinct.

\*It is unclear to which subclass (Cephalobaenida or Porocephalida) the upper Cambrian pentastomid larvae belong, and so they were assigned randomly because the choice made no difference to our results.
