# Supplementary material
Source: PubMed Central journal article supplement (PMC2290764)
Supplement: pnas_0709378105_3.pdf [file pnas_0709378105_3.pdf]

Appendix C. Test for correlation among morphological indices

Table C1. Correlation coefficients (Pearson's product-moment correlations) among measures of limb number and diversity for 66 free-living crustacean orders

|                            | Brillouin tagmosis            | Total limb number               | No. of limb types             | No. of limb types per limb    | Average disparity per limb     |
|----------------------------|-------------------------------|---------------------------------|-------------------------------|-------------------------------|--------------------------------|
| Total limb number          | -0.196 ( $P = 0.115$ )        |                                 |                               |                               |                                |
| No. of limb types          | <b>0.862</b> ( $P < 0.0001$ ) | <b>0.253</b> ( $P = 0.0402$ )   |                               |                               |                                |
| No. of limb types per limb | <b>0.585</b> ( $P < 0.0001$ ) | - <b>0.662</b> ( $P < 0.0001$ ) | 0.200 ( $P = 0.108$ )         |                               |                                |
| Average disparity per limb | <b>0.524</b> ( $P < 0.0001$ ) | - <b>0.561</b> ( $P < 0.0001$ ) | <b>0.270</b> ( $P = 0.0286$ ) | <b>0.888</b> ( $P < 0.0001$ ) | --                             |
| Total disparity score      | <b>0.757</b> ( $P < 0.0001$ ) | <b>0.254</b> ( $P = 0.0399$ )   | <b>0.895</b> ( $P < 0.0001$ ) | 0.131 ( $P = 0.295$ )         | <b>0.382</b> ( $P = 0.00157$ ) |

*P* values are provided for simple regression analysis of each pair of characters.
