# Supplementary material
Source: PubMed Central journal article supplement (PMC2290764)
Supplement: pnas_0709378105_5.pdf [file pnas_0709378105_5.pdf]

## Appendix E. List of fossil and living matched pairs

Table E1. List of phylogenetically matched pairs of fossil and living crustacean taxa, used for analysis presented in Table A1

| Pair      | Class         | Order                                                        | Exemplar                           |
|-----------|---------------|--------------------------------------------------------------|------------------------------------|
| 1. Fossil | Malacostraca  | Belotelsonidea                                               | <i>Belotelson magister</i>         |
| 1. Living | Malacostraca  | Amphionidacea                                                | <i>Amphionides reynaudii</i>       |
| 2. Fossil | Malacostraca  | Paleostomatopoda                                             | <i>Tyrranophontes theridion</i>    |
| 2. Living | Malacostraca  | Stomatopoda                                                  | <i>Alima</i>                       |
| 3. Fossil | Malacostraca  | Pygocephalomorpha                                            | <i>Anthracaris gracilis</i>        |
| 3. Living | Malacostraca  | Mysida                                                       | <i>Mysis relicta</i>               |
| 4. Fossil | Malacostraca  | Anthracocaridacea                                            | <i>Acadiocaris novascotica</i>     |
| 4. Living | Malacostraca  | Anthracocaridacea<br>(formerly in order<br>Spelaeogriphacea) | <i>Spelaeogriphus lepidops</i>     |
| 5. Fossil | Malacostraca  | Aeschronectida                                               | <i>Kalidecthes richardsoni</i>     |
| 5. Living | Malacostraca  | Decapoda                                                     | <i>Homarus americanus</i>          |
| 5. Living | Malacostraca  | Euphausiacea                                                 | <i>Meganyctiphanes norvegica</i>   |
| 6. Fossil | Malacostraca  | Paleocaridacea                                               | <i>Acanthotelson stimpsoni</i>     |
| 6. Living | Malacostraca  | Cumacea                                                      | <i>Cyclaspis bacescui</i>          |
| 6. Living | Malacostraca  | Mictacea                                                     | <i>Mictocaris halope</i>           |
| 7. Fossil | ?             | ?                                                            | <i>Martinssonina</i>               |
| 7. Fossil | ?             | ?                                                            | <i>Skara</i>                       |
| 7. Living | Maxillopoda   | Mystacocaridida                                              | <i>Derocheilocaris typicus</i>     |
| 7. Living | Maxillopoda   | (multiple copepod<br>orders)                                 | pooled copepod value               |
| 8. Fossil | Branchiopoda  | Lipostraca                                                   | <i>Lepidocaris rhyniensis</i>      |
| 8. Living | Cephalocarida | Brachypoda                                                   | <i>Hutchinsoniella macracantha</i> |
| 9. Fossil | Malacostraca  | Archeostraca                                                 | <i>Nahecaris</i>                   |
| 9. Living | Malacostraca  | Leptostraca                                                  | <i>Nebalia pugettensis</i>         |

| <b>Pair</b> | <b>Class</b>  | <b>Order</b>  | <b>Exemplar</b>               |
|-------------|---------------|---------------|-------------------------------|
| 10. Fossil  | Remipedia     | Enantiopoda   | <i>Tesnusocaris goldlichi</i> |
| 10. Living  | Remipedia     | Nectiopoda    | <i>Speleonectes ondinae</i>   |
| 11. Fossil  | ?             | ?             | <i>Odaraia</i>                |
| 11. Living  | Branchiopoda  | Diplostraca   | Pooled value                  |
| 12. Fossil  | Branchiopoda? | ?             | <i>Rehbachella</i>            |
| 12. Living  | Malacostraca  | Bathynellacea | <i>Bathynella natans</i>      |

When more than one taxon is listed in either the “fossil” or “living” category, these taxa form a clade and were averaged for the analysis.
