# Supplementary material
Source: PubMed Central journal article supplement (PMC2290764)
Supplement: pnas_0709378105_6.pdf [file pnas_0709378105_6.pdf]

## Appendix F. Full results of independent contrasts analysis on tagmosis-diversity relationship

Table F1. The relationship between tagmosis and the diversity of extant crustacean clades.

| Trait                           | Sign test                 |                           | Wilcoxon test<br>(H <sub>0</sub> : median = 0) |         | Regression (n = 37 contrasts) |         |         |                       |                |               |
|---------------------------------|---------------------------|---------------------------|------------------------------------------------|---------|-------------------------------|---------|---------|-----------------------|----------------|---------------|
|                                 | No. positive<br>contrasts | No. negative<br>contrasts | Neutral<br>contrasts                           | P value | V                             | P value | slope   | F-stat                | R <sup>2</sup> | P value       |
| Brillouin tagmosis              | 23                        | 14                        | 0                                              | 0.188   | 478.5                         | 0.0563~ | 1.501   | 7.085 <sub>1,36</sub> | 0.162          | <b>0.0121</b> |
| Total no. of limbs              | 15                        | 17                        | 5                                              | 0.86    | 251.5                         | 0.822   | -0.0135 | 1.151 <sub>1,36</sub> | 0.0310         | 0.290         |
| No. of limb types               | 20                        | 14                        | 3                                              | 0.392   | 376                           | 0.185   | 0.103   | 0.802 <sub>1,36</sub> | 0.022          | 0.376         |
| No. of types per<br>limb        | 17                        | 20                        | 0                                              | 0.743   | 333                           | 0.786   | 2.144   | 4.524 <sub>1,36</sub> | 0.112          | <b>0.0403</b> |
| Average disparity<br>per limb   | 17                        | 19                        | 1                                              | 0.868   | 364                           | 0.632   | 0.713   | 4.416 <sub>1,36</sub> | 0.109          | <b>0.0427</b> |
| Total disparity<br>across limbs | 16                        | 19                        | 2                                              | 0.736   | 334                           | 0.762   | 0.00765 | 0.049 <sub>1,36</sub> | 0.0014         | 0.826         |

Positive trait contrasts are those for which the more diverse clade has the larger trait value, while negative contrasts are those for which the less diverse clade has the larger value. Neutral contrasts (no trait difference) are omitted from the sign and Wilcoxon tests. Regressions were repeated following data transformation (square, square root, or log transformations as appropriate) to improve the distribution of residuals; findings were similar (results not shown).
